# Supplementary material for: In silico study on the mechanism of formation of hydrazine and nitrogen in the reactions of excess hydroxylamine with 2,4-dinitrophenyl diethyl phosphate
Source: Royal Society of Chemistry journal article supplement (doi:10.1039/c4nj02300e), 2015-01-01
Supplement: c4nj02300e1.pdf [file c4nj02300e1.pdf]

# In silico study on the mechanism of formation of hydrazine and nitrogen in the reactions of excess hydroxylamine with 2,4-dinitrophenyl diethyl phosphate

Nellore Bhanu Chandar<sup>a,b</sup> and Bishwajit Ganguly\*<sup>a,b</sup>

<sup>a</sup>Computation and Simulation Unit (Analytical Discipline and Centralized Instrument Facility), CSIR-Central Salt & Marine Chemicals Research Institute, Bhavnagar, Gujarat, India-364 002

<sup>b</sup>Academy of Scientific and Innovative Research, CSIR-CSMCRI, Bhavnagar, Gujarat, India-364 002.

## Supporting information

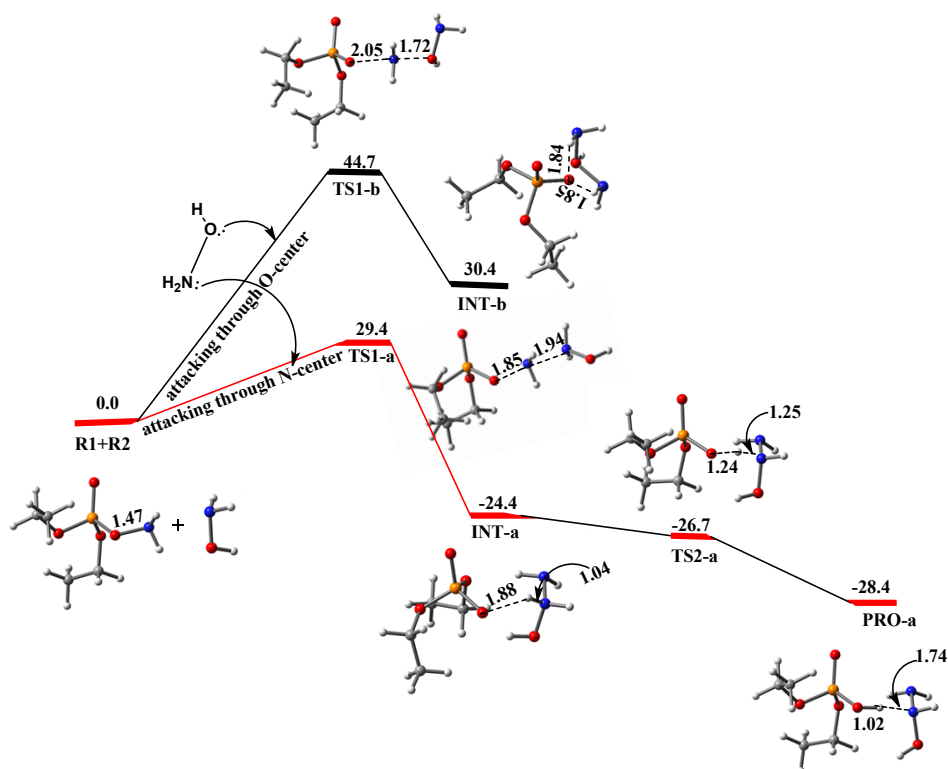

**Fig. S1.** The potential energy surface and the corresponding geometries for nucleophilic addition in excess of hydroxylamine with hydroxylamine-O-phosphate ester in the phosphate ester intermediate decomposition at MP2/6-31G(d) level in aqueous phase. The relative free energies are given in kcal/mol. (red = oxygen; white = hydrogen; blue = nitrogen; gray = carbon; orange = phosphorous).

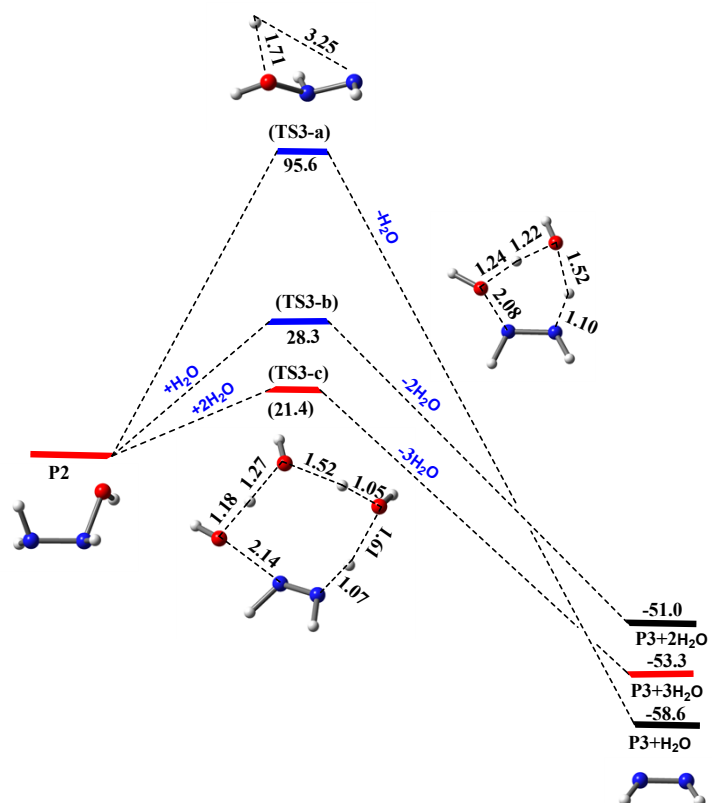

**Fig.S2.** The potential energy surface and the corresponding geometries for formation of diimide from hydroxylhydrazine in excess of hydroxylamine in the phosphate ester intermediate decomposition at MP2/6-31G(d) level in aqueous phase. The relative free energies are given in kcal/mol. (red = oxygen; white = hydrogen; blue = nitrogen).

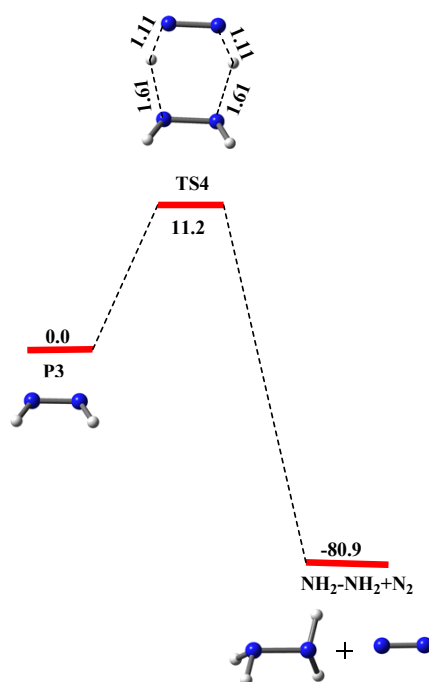

**Fig. S3.** The potential energy surface and the corresponding geometries for formation of final products (nitrogen and hydrazine) from diimide at MP2/6-31G(d) level of theory in aqueous phase. The relative free energies are given in kcal/mol. (white = hydrogen; blue = nitrogen).

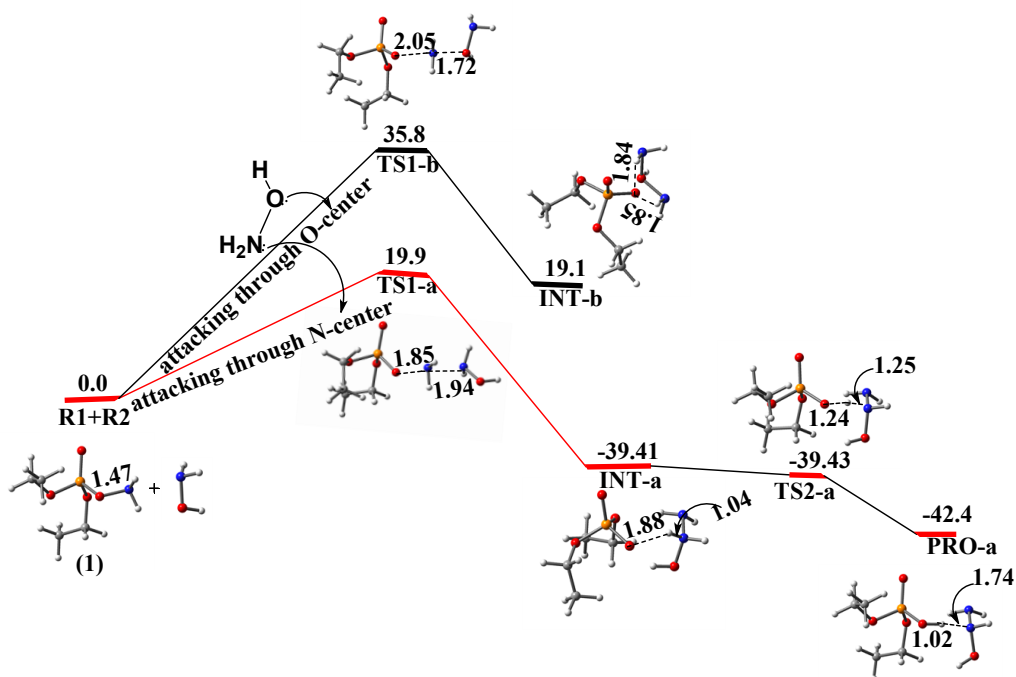

**Fig. S4.** The potential energy surface and the corresponding geometries for nucleophilic addition in excess of hydroxylamine with hydroxylamine-*O*-phosphate ester in the phosphate ester intermediate decomposition at MP2/6-311++G(d,p)//MP2/6-31G(d) level in the aqueous phase. The relative electronic energies are given in kcal/mol. (red = oxygen; white = hydrogen; blue = nitrogen; gray = carbon; orange = phosphorous).

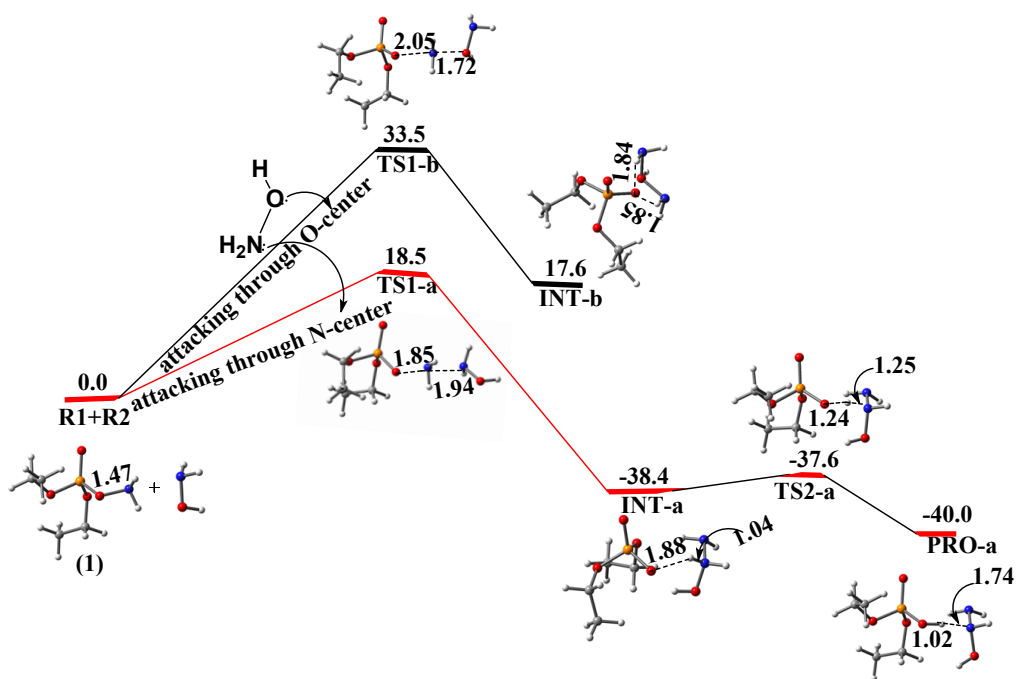

**Fig. S5.** The potential energy surface and the corresponding geometries for nucleophilic addition in excess of hydroxylamine with hydroxylamine-*O*-phosphate ester in the phosphate ester intermediate decomposition at M06-2x/6-31G(d) level in the aqueous phase. The relative electronic energies are given in kcal/mol. (red = oxygen; white = hydrogen; blue = nitrogen; gray = carbon; orange = phosphorous).

**Table S2.** Calculated Softness, Fukui function and difference in local softness of nucleophile ( $f^-(r)$ ) (oxygen of hydroxylamine) and electrophiles ( $f^+(r)$ ) (hydroxylamine-*O*-phosphate ester nitrogen and phosphorus centres) in aqueous phase at MP2/6-31G(d) level of theory.

|                                                        | Global softness | Fukui function      | Local softness | Difference in local softness ( $\Delta s$ ) |
|--------------------------------------------------------|-----------------|---------------------|----------------|---------------------------------------------|
| Hydroxylamine (oxygen)                                 | 1.53            | -0.083 ( $f^-(r)$ ) | -0.13          |                                             |
| Hydroxylamine- <i>O</i> -phosphate ester (nitrogen)    | 1.51            | -0.37 ( $f^+(r)$ )  | -0.56          | 0.43                                        |
| Hydroxylamine- <i>O</i> -phosphate ester (phosphorous) | 1.51            | -0.03 ( $f^+(r)$ )  | -0.04          | 0.09                                        |

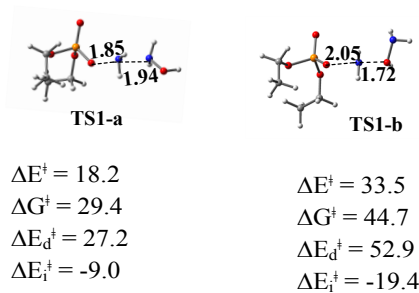

**Fig. S6.** MP2/6-31G(d) level calculated activation  $\Delta E^\ddagger$ ,  $\Delta G^\ddagger$ , distortion  $\Delta E_d^\ddagger$  and interaction energies  $\Delta E_i^\ddagger$  (kcal/mol) for the reaction between hydroxylamine-O-phosphate ester and hydroxylamine. All distances in the TS are in angstroms.

---

### Cartesian coordinates

#### R1

$\Delta E = -131.32741146$  Ha

$\Delta G = -131.309030$  Ha

0 1

|   |             |             |             |
|---|-------------|-------------|-------------|
| N | 0.70387300  | -0.00022800 | -0.12209500 |
| H | 0.99515400  | 0.81642600  | 0.41899700  |
| O | -0.73863800 | -0.00021800 | -0.10278200 |
| H | -1.00826200 | 0.00176500  | 0.83584600  |
| H | 0.99510200  | -0.81485000 | 0.42207800  |

#### R2

$\Delta E = -854.63322084$  Ha

$\Delta G = -854.489279$  Ha

0 1

|   |             |             |             |
|---|-------------|-------------|-------------|
| C | -2.71327900 | -1.73082100 | -0.24510600 |
| C | -2.29628400 | -0.30294600 | -0.51155100 |
| O | -1.50344900 | 0.18975500  | 0.61680000  |

|   |             |             |             |
|---|-------------|-------------|-------------|
| O | 0.72741900  | 0.76731600  | 1.75257200  |
| P | 0.08184900  | 0.33683300  | 0.48694500  |
| O | 0.54958000  | -1.07049300 | -0.12598500 |
| C | 1.91214100  | -1.54147600 | 0.12482800  |
| C | 2.90808800  | -0.84654400 | -0.77715900 |
| H | -1.83581500 | -2.37690700 | -0.18783900 |
| H | -1.71820700 | -0.21111700 | -1.43394100 |
| H | -3.15316300 | 0.37001700  | -0.56992000 |
| H | 2.14246700  | -1.39041400 | 1.18139400  |
| H | 1.86286200  | -2.61115400 | -0.07912000 |
| H | 3.89804900  | -1.28912400 | -0.63254300 |
| H | 2.97185500  | 0.21941200  | -0.54849300 |
| H | 2.62104800  | -0.96699200 | -1.82385600 |
| O | 0.35092800  | 1.27320900  | -0.82926600 |
| H | -3.35924900 | -2.08206300 | -1.05515200 |
| H | -3.26717000 | -1.79462600 | 0.69393000  |
| N | -0.16819000 | 2.61877200  | -0.53053600 |
| H | 0.66751200  | 3.19680500  | -0.63759000 |
| H | -0.74040700 | 2.80468000  | -1.35634200 |

**TS1-a**

$\Delta E = -985.93166993$  Ha

$\Delta G = -985.751396$  Ha

0 1

|   |             |             |             |
|---|-------------|-------------|-------------|
| C | -2.03034800 | 2.81808800  | -0.63217800 |
| C | -0.70745700 | 2.08378600  | -0.64567600 |
| O | -0.48366100 | 1.45992300  | 0.64701700  |
| O | -0.28510700 | -0.56556800 | 2.17535200  |

|   |             |             |             |
|---|-------------|-------------|-------------|
| P | -0.55983700 | -0.15346400 | 0.76362700  |
| O | -2.10851300 | -0.38979800 | 0.29788100  |
| C | -2.51576100 | -1.74624900 | -0.02764400 |
| C | -2.58345400 | -1.91949300 | -1.52953500 |
| H | -2.84785800 | 2.11015200  | -0.48539900 |
| H | -0.67605900 | 1.32651300  | -1.43308400 |
| H | 0.13072700  | 2.76894900  | -0.79751400 |
| H | -1.82891000 | -2.46779200 | 0.42543600  |
| H | -3.49698600 | -1.87988500 | 0.43396200  |
| H | -2.94877400 | -2.92103500 | -1.77719200 |
| H | -1.59171900 | -1.78467900 | -1.96403700 |
| H | -3.26594300 | -1.18401100 | -1.96234900 |
| O | 0.28027200  | -0.80627100 | -0.38998900 |
| H | -2.17901600 | 3.34088300  | -1.58203800 |
| H | -2.04769700 | 3.55405000  | 0.17515300  |
| N | 2.00647500  | -0.25824600 | -0.03434900 |
| H | 2.25872500  | -1.24785000 | 0.00345200  |
| H | 2.06185400  | -0.01165000 | -1.02486300 |
| N | 3.90065300  | 0.14650900  | 0.09344400  |
| H | 4.20299700  | -0.12009700 | 1.03353300  |
| O | 4.68222900  | -0.53614700 | -0.87475700 |
| H | 5.61238100  | -0.27018200 | -0.71942400 |
| H | 4.00428900  | 1.15685500  | -0.02754400 |

### INT1-a

$\Delta E = -986.02380009$  Ha

$\Delta G = -985.837214$  Ha

0 1

|   |             |             |             |
|---|-------------|-------------|-------------|
| C | -0.97862600 | 2.94288400  | -0.58435100 |
| C | 0.02414800  | 1.81761100  | -0.70551800 |
| O | 0.25662800  | 1.22650600  | 0.60422300  |
| O | -0.36657600 | -0.41110000 | 2.44428000  |
| P | -0.39937800 | -0.24611600 | 0.95465600  |
| O | -1.90815200 | -0.01713600 | 0.36907800  |
| C | -2.62648600 | -1.16685600 | -0.15286500 |
| C | -2.53631600 | -1.19731900 | -1.66311500 |
| H | -1.93907200 | 2.54959600  | -0.24825000 |
| H | -0.32043100 | 1.05327900  | -1.40708400 |
| H | 0.99491600  | 2.18478600  | -1.04893300 |
| H | -2.23409800 | -2.08924800 | 0.28332000  |
| H | -3.65901400 | -1.04213400 | 0.18129400  |
| H | -3.13761900 | -2.02154400 | -2.05957900 |
| H | -1.49935100 | -1.33858100 | -1.97273900 |
| H | -2.91140700 | -0.26073000 | -2.08303500 |
| O | 0.30008000  | -1.30072800 | 0.07787200  |
| H | -1.11346200 | 3.43091300  | -1.55461900 |
| H | -0.62522800 | 3.68714100  | 0.13314000  |
| N | 3.17839400  | 0.28921800  | 0.33183600  |
| H | 2.28794200  | 0.76890600  | 0.50620300  |
| H | 3.72516700  | 0.84094000  | -0.33081300 |
| N | 2.84521300  | -0.91651800 | -0.32108600 |
| H | 2.16032400  | -1.43091100 | 0.27425400  |
| O | 2.20023900  | -0.78016100 | -1.57866800 |
| H | 1.24540000  | -0.90317800 | -1.27984500 |



H 3.69727600 -1.46336500 -0.48759200

**TS2-a**

$\Delta E = -986.01924489$  Ha

$\Delta G = -985.840850$  Ha

0 1

C -0.10076100 3.23672700 -0.21906700

C 0.63781100 1.93932400 -0.45455000

O 0.42965400 1.05118700 0.68502700

O -0.93432300 -0.76801400 1.86504200

P -0.55086500 -0.24636000 0.51872800

O -1.78476400 0.39112400 -0.32001300

C -3.10824100 -0.18639100 -0.14161600

C -3.24810900 -1.49175700 -0.89670300

H -1.17382000 3.04833200 -0.15815000

H 0.30186100 1.45234500 -1.37389200

H 1.71715700 2.09505100 -0.52049200

H -3.29516600 -0.31671100 0.92679600

H -3.79073800 0.57110300 -0.52993900

H -4.27706900 -1.85523200 -0.81675800

H -2.58167000 -2.25497400 -0.48848800

H -3.01013600 -1.34607500 -1.95272400

O 0.18391300 -1.21102100 -0.47125100

H 0.09192300 3.93078500 -1.04270300

H 0.23515500 3.69893100 0.71186200

N 3.02871000 -0.60987800 0.95980200

H 2.40752700 0.19576900 1.05455300

H 3.98571200 -0.27899500 0.82743000

|   |            |             |             |
|---|------------|-------------|-------------|
| N | 2.62384400 | -1.29484100 | -0.19538700 |
| H | 1.37800100 | -1.40881500 | -0.20824200 |
| O | 2.91092000 | -0.57691200 | -1.41343000 |
| H | 2.01565900 | -0.42039300 | -1.78489600 |
| H | 3.16331000 | -2.16101400 | -0.26757500 |

PRO-a

$\Delta E = -986.02385661$  Ha

$\Delta G = -985.843572$  Ha

0 1

|   |             |             |             |
|---|-------------|-------------|-------------|
| C | 0.01419100  | 3.22755100  | -0.01339700 |
| C | 0.68487500  | 1.92022100  | -0.36395400 |
| O | 0.41467600  | 0.94177900  | 0.69151100  |
| O | -0.89014100 | -1.03645500 | 1.66140500  |
| P | -0.61135300 | -0.27527900 | 0.41416200  |
| O | -1.87524600 | 0.44398900  | -0.27002400 |
| C | -3.21071000 | -0.09886900 | -0.03299300 |
| C | -3.45605400 | -1.33006000 | -0.87753900 |
| H | -1.06865200 | 3.09578800  | 0.02052000  |
| H | 0.33660200  | 1.53182200  | -1.32427700 |
| H | 1.77209000  | 2.01355000  | -0.39950100 |
| H | -3.31964300 | -0.30842500 | 1.03299300  |
| H | -3.88136400 | 0.71620500  | -0.30589900 |
| H | -4.49042500 | -1.66201100 | -0.74809000 |
| H | -2.79488200 | -2.14752400 | -0.58040400 |
| H | -3.29026900 | -1.10630700 | -1.93348800 |
| O | 0.02281300  | -1.08366700 | -0.81412400 |

|   |            |             |             |
|---|------------|-------------|-------------|
| H | 0.25587700 | 3.98120000  | -0.76863900 |
| H | 0.36257900 | 3.58355200  | 0.95844600  |
| N | 2.89001700 | -0.91357100 | 1.04759200  |
| H | 2.34190900 | -0.06966100 | 1.21154800  |
| H | 3.87426800 | -0.68742700 | 1.21069100  |
| N | 2.70479600 | -1.25814300 | -0.30459500 |
| H | 1.00166500 | -1.29545000 | -0.64343800 |
| O | 3.42484800 | -0.32944300 | -1.17061300 |
| H | 2.72326300 | 0.01498800  | -1.75526300 |
| H | 3.21417400 | -2.13180200 | -0.44654600 |

**TS1-b**

$\Delta E = -985.90723214$  Ha

$\Delta G = -985.727113$  Ha

0 1

|   |             |             |             |
|---|-------------|-------------|-------------|
| C | -2.20959300 | 2.72384700  | -0.25667100 |
| C | -0.87940200 | 2.04364500  | -0.50141400 |
| O | -0.44398700 | 1.37435800  | 0.70684200  |
| O | 0.03420000  | -0.69683800 | 2.08467600  |
| P | -0.43371100 | -0.25703500 | 0.72748500  |
| O | -2.04396600 | -0.52222900 | 0.50678600  |
| C | -2.44634200 | -1.79233700 | -0.06091200 |
| C | -2.75521500 | -1.62964800 | -1.53431200 |
| H | -2.96879000 | 1.97616400  | -0.02088000 |
| H | -0.94419300 | 1.32538700  | -1.32322100 |
| H | -0.09981400 | 2.77055600  | -0.74800800 |
| H | -1.66802200 | -2.54549500 | 0.09397200  |
| H | -3.33362600 | -2.10300800 | 0.49729300  |

|   |             |             |             |
|---|-------------|-------------|-------------|
| H | -3.11690000 | -2.57390100 | -1.95397700 |
| H | -1.85302400 | -1.32558200 | -2.06738300 |
| H | -3.52741300 | -0.86904300 | -1.67516100 |
| O | 0.26302300  | -0.80534800 | -0.53569200 |
| H | -2.52070800 | 3.27921900  | -1.14706700 |
| H | -2.12974200 | 3.42422700  | 0.57835200  |
| N | 2.16617600  | -0.05208700 | -0.47951000 |
| H | 2.36368000  | -1.05451900 | -0.53577800 |
| H | 1.87252300  | 0.21685600  | -1.42186800 |
| N | 4.57883000  | -0.62883900 | -0.00064200 |
| H | 5.53667000  | -0.46291400 | -0.31804600 |
| O | 3.81779300  | 0.34777500  | -0.76592500 |
| H | 3.88654200  | 1.23574200  | -0.33828700 |
| H | 4.52024300  | -0.32645200 | 0.97520300  |

### INT1-b

$\Delta E = -985.93182275$  Ha

$\Delta G = -985.749914$  Ha

0 1

|   |             |             |             |
|---|-------------|-------------|-------------|
| C | -1.19105100 | 2.21326300  | -1.98342000 |
| C | -0.10036400 | 1.68736400  | -1.07529500 |
| O | -0.57788700 | 1.67130000  | 0.29107800  |
| O | -1.41772800 | 0.49305800  | 2.36528500  |
| P | -0.79113100 | 0.22510300  | 1.02617900  |
| O | -1.86015100 | -0.43929800 | -0.03653200 |
| C | -1.91539700 | -1.88195100 | -0.13330500 |
| C | -1.34332400 | -2.32235700 | -1.46387100 |
| H | -2.05164400 | 1.54253100  | -1.95090700 |

|   |             |             |             |
|---|-------------|-------------|-------------|
| H | 0.21456600  | 0.68492500  | -1.37751200 |
| H | 0.78012200  | 2.33696100  | -1.09105300 |
| H | -1.37015800 | -2.34328500 | 0.69440000  |
| H | -2.96950900 | -2.16014100 | -0.04669000 |
| H | -1.43059200 | -3.40750800 | -1.57752600 |
| H | -0.28871400 | -2.04669100 | -1.52718200 |
| H | -1.88166500 | -1.84199800 | -2.28473800 |
| O | 0.50890200  | -0.58305800 | 0.95757900  |
| H | -0.82911700 | 2.27880700  | -3.01430200 |
| H | -1.50510900 | 3.20926400  | -1.66180500 |
| N | 2.98294200  | 0.64911800  | 0.72922900  |
| H | 3.59510700  | 0.02996800  | 1.27523700  |
| H | 2.01292500  | 0.47409400  | 1.05357000  |
| N | 2.76478300  | -1.51289700 | -0.39553200 |
| H | 1.81204400  | -1.50792600 | 0.01617000  |
| O | 2.89816500  | -0.02632200 | -0.56947000 |
| H | 3.78544700  | 0.11869800  | -0.98891100 |
| H | 2.64959800  | -1.80113800 | -1.37549900 |

## P2

$\Delta E = -186.49975289$  Ha

$\Delta G = -186.466009$  Ha

0 1

|   |             |             |             |
|---|-------------|-------------|-------------|
| H | -1.10518600 | -0.73458700 | -0.86721200 |
| N | -1.19625000 | -0.15648500 | -0.02687900 |
| H | -1.28627400 | -0.79691600 | 0.75991400  |
| N | -0.00235100 | 0.57082400  | 0.18081000  |
| H | 0.03495700  | 1.24088900  | -0.58762000 |

|   |            |             |             |
|---|------------|-------------|-------------|
| O | 1.15535300 | -0.26666000 | -0.14089500 |
| H | 1.50388500 | -0.47647800 | 0.74455900  |

**TS3-a**

$\Delta E = -186.34179313$  Ha

$\Delta G = -186.313735$  Ha

0 1

|   |             |             |             |
|---|-------------|-------------|-------------|
| H | 1.67305600  | 1.20745000  | 1.04878200  |
| N | -1.27518800 | 0.25467300  | 0.07843900  |
| H | -1.13058300 | 1.01717000  | -0.60414200 |
| N | -0.20652900 | -0.51427400 | -0.03647400 |
| H | -0.15689600 | -1.21624800 | 0.71086200  |
| O | 1.03310800  | 0.16769600  | -0.14820500 |
| H | 1.72157700  | -0.53273500 | -0.26361500 |

**TS3-b**

$\Delta E = -262.67051109$  Ha

$\Delta G = -262.622090$  Ha

0 1

|   |             |             |             |
|---|-------------|-------------|-------------|
| N | 0.95850700  | -0.91677100 | -0.19349100 |
| H | 1.39748700  | -1.02902300 | -1.11400300 |
| H | -0.07554400 | -1.26328000 | -0.02328800 |
| N | 1.14357000  | 0.14690700  | 0.47780700  |
| H | 1.90552800  | 0.69608400  | 0.05836800  |
| O | -0.33047600 | 1.40366500  | -0.28263200 |
| H | -0.49105000 | 1.92354100  | 0.52554600  |
| O | -1.49691400 | -0.72473400 | 0.00340700  |
| H | -1.03582500 | 0.39986100  | -0.13126000 |
| H | -1.79601200 | -0.76958600 | 0.92822300  |

### TS3-c

$\Delta E = -338.90012725$  Ha

$\Delta G = -338.830623$  Ha

0 1

|   |             |             |             |
|---|-------------|-------------|-------------|
| N | 0.30813800  | -1.51037800 | -0.29469100 |
| H | 0.69268400  | -1.95428400 | -1.13527600 |
| H | -0.73436500 | -1.29789900 | -0.20610200 |
| N | 1.04575300  | -0.96799500 | 0.56886900  |
| H | 2.02945200  | -1.15230500 | 0.34912500  |
| O | 1.63436600  | 0.92872200  | -0.23302800 |
| H | 2.05760500  | 1.34479100  | 0.53891400  |
| O | -2.09977500 | -0.46004200 | -0.03162000 |
| H | -1.60133600 | 0.45922800  | -0.04813600 |
| H | -2.41006200 | -0.55969300 | 0.88419000  |
| O | -0.69258000 | 1.67249800  | -0.09956600 |
| H | -0.76707700 | 2.06572000  | 0.78572400  |
| H | 0.51978000  | 1.31363000  | -0.17397900 |

### P3

$\Delta E = -110.32001084$  Ha

$\Delta G = -110.313049$  Ha

0 1

|   |             |             |             |
|---|-------------|-------------|-------------|
| N | -0.60544800 | -0.18768500 | -0.00000500 |
| H | -1.16933800 | 0.68002400  | 0.00003700  |
| N | 0.60529400  | 0.18757800  | -0.00000500 |
| H | 1.17041400  | -0.67927500 | 0.00003700  |

### P4

$\Delta E = -110.31431807$  Ha

$\Delta G = -110.307813$  Ha

0 1

|   |             |             |             |
|---|-------------|-------------|-------------|
| N | 0.63137700  | -0.12030700 | 0.00000600  |
| H | 1.02117300  | 0.84218800  | -0.00002700 |
| N | -0.63136700 | -0.12031400 | -0.00000600 |
| H | -1.02124300 | 0.84215600  | 0.00002700  |

### **H<sub>2</sub>O**

$\Delta E = -76.20492572$  Ha

$\Delta G = -76.201197$  Ha

0 1

|   |            |             |             |
|---|------------|-------------|-------------|
| O | 0.00000000 | 0.00000000  | 0.12057800  |
| H | 0.00000000 | 0.76017000  | -0.48231100 |
| H | 0.00000000 | -0.76017000 | -0.48231100 |

### **2H<sub>2</sub>O**

$\Delta E = -152.41917748$  Ha

$\Delta G = -152.398697$  Ha

0 1

|   |             |             |             |
|---|-------------|-------------|-------------|
| O | 1.50660300  | -0.08344400 | -0.04604200 |
| H | 0.52718800  | -0.08454400 | -0.04964900 |
| H | 1.72993400  | 0.74030800  | 0.41335800  |
| O | -1.37154000 | -0.08414000 | -0.05955600 |
| H | -1.65658300 | -0.09139800 | 0.86953200  |
| H | -1.68104000 | 0.77630400  | -0.38845500 |

### **3H<sub>2</sub>O**

$\Delta E = -228.63508979$  Ha

$\Delta G = -228.596728$  Ha

0 1



|   |             |             |             |
|---|-------------|-------------|-------------|
| H | -1.75674500 | -1.41369800 | 0.19880700  |
| O | 2.22577600  | -0.61803400 | -0.08250000 |
| H | 2.15441200  | -1.00734000 | 0.80204500  |
| O | -2.10744100 | -0.55957700 | -0.10530200 |
| H | -0.71309900 | 0.63550000  | -0.09929400 |
| H | -2.74910100 | -0.31388600 | 0.58237000  |
| O | 0.07046700  | 1.23171300  | -0.08556300 |
| H | 0.05400300  | 1.62286800  | 0.80294300  |
| H | 1.50011600  | 0.04374100  | -0.09995600 |

#### TS4

$\Delta E = -220.62707413$  Ha

$\Delta G = -220.597824$  Ha

0 1

|   |             |             |             |
|---|-------------|-------------|-------------|
| N | 1.37463300  | 0.61240600  | 0.01866400  |
| H | 0.34966500  | 1.02151300  | -0.10687100 |
| N | 1.37440800  | -0.61237900 | 0.01827100  |
| H | 0.34901800  | -1.02112400 | -0.10756300 |
| N | -1.22131000 | 0.65381500  | -0.12161000 |
| H | -1.42357600 | 1.02341400  | 0.82742800  |
| N | -1.22095100 | -0.65392500 | -0.12120300 |
| H | -1.42256500 | -1.02322000 | 0.82815800  |

NH<sub>2</sub>-NH<sub>2</sub>

$\Delta E = -111.50720291$  Ha

$\Delta G = -111.475114$  Ha

0 1

|   |             |             |            |
|---|-------------|-------------|------------|
| H | 1.03177500  | 0.40233800  | 0.83736500 |
| H | -1.03201800 | -0.40040300 | 0.83823300 |

|   |             |             |             |
|---|-------------|-------------|-------------|
| N | 0.71655900  | 0.10119900  | -0.08649700 |
| H | 1.12706100  | -0.81854300 | -0.23202200 |
| N | -0.71652400 | -0.10141300 | -0.08633900 |
| H | -1.12706300 | 0.81810900  | -0.23372200 |

**N2**

$\Delta E = -109.25575727$  Ha

$\Delta G = -109.269288$  Ha

0 1

|   |            |            |             |
|---|------------|------------|-------------|
| N | 0.00000000 | 0.00000000 | 0.56518900  |
| N | 0.00000000 | 0.00000000 | -0.56518900 |

**The End**
